# Supplementary material for: Tackling the cancer burden: the economic impact of primary prevention policies
Source: PubMed Central journal article supplement (PMC7931126; doi:10.1002/1878-0261.12812), 2020-10-18
Supplement: MOL2-15-779-s001.pdf [file MOL2-15-779-s001.pdf]

■ Cancer cases avoided (unrelated)

■ Cancer cases avoided (related)

Australia

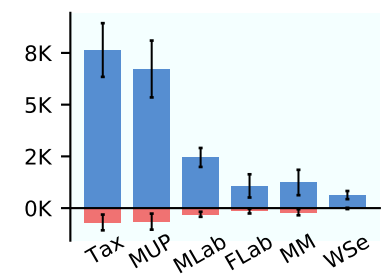

Austria

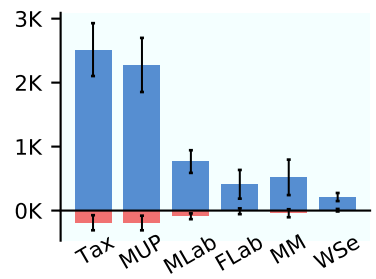

Belgium

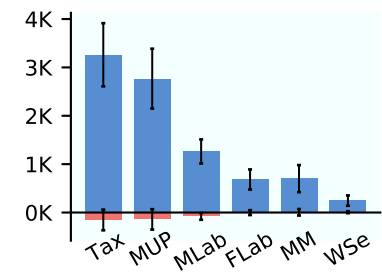

Bulgaria

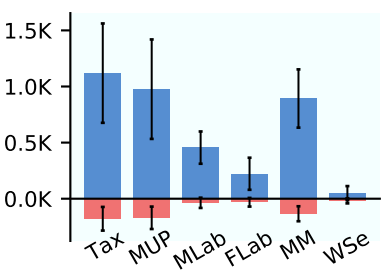

Canada

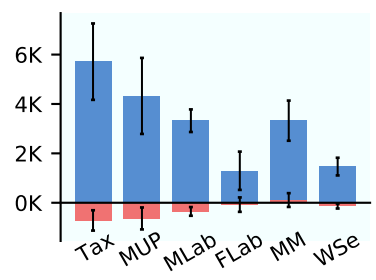

Croatia

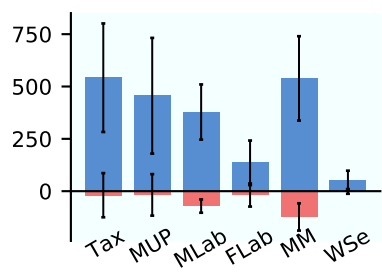

Cyprus

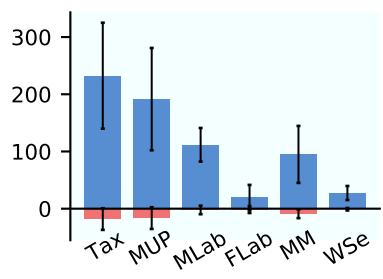

Czech Republic

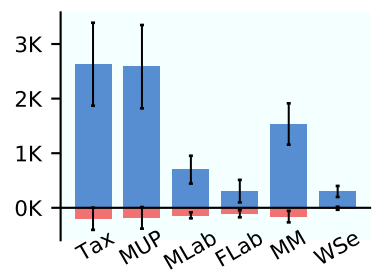

Denmark

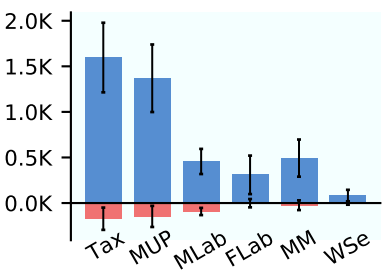

Estonia

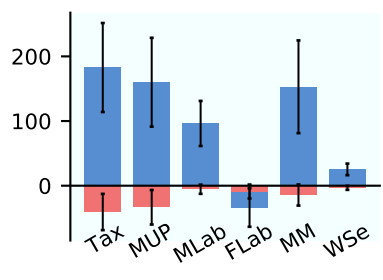

Finland

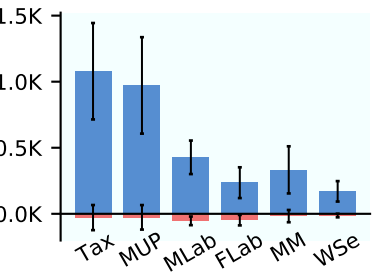

France

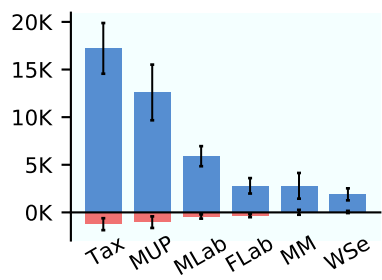

Germany

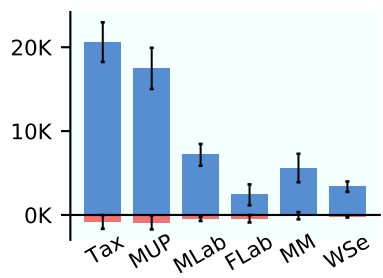

Greece

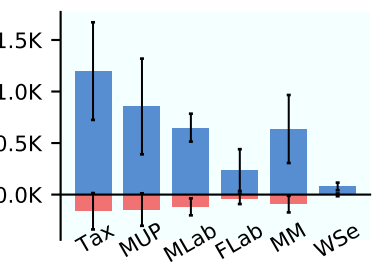

Hungary

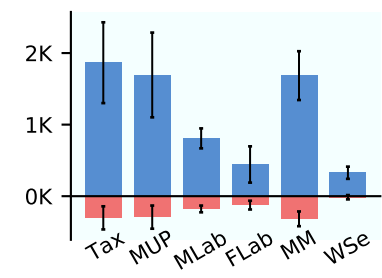

Cancer cases avoided (unrelated)

Cancer cases avoided (related)

Iceland

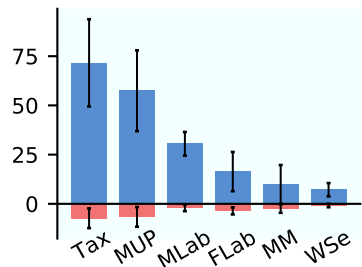

Ireland

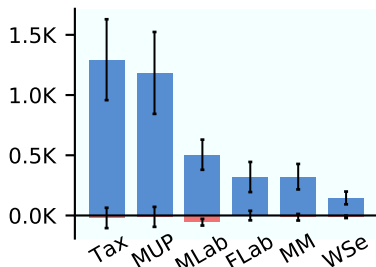

Italy

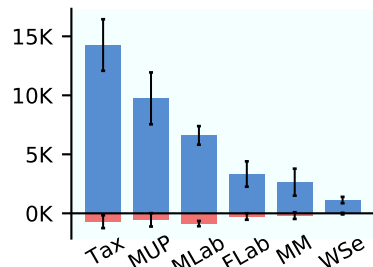

Japan

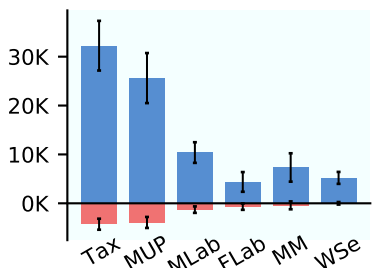

Latvia

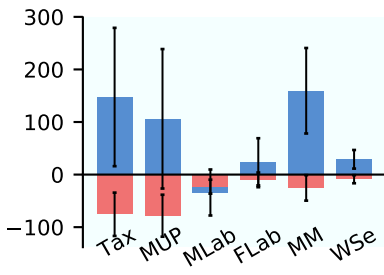

Lithuania

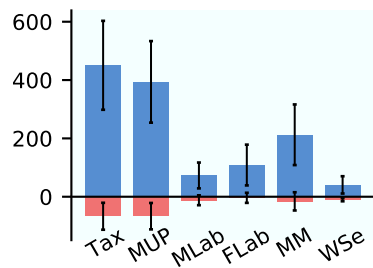

Luxembourg

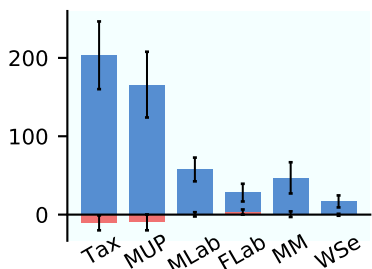

Malta

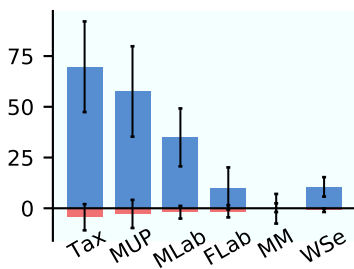

Mexico

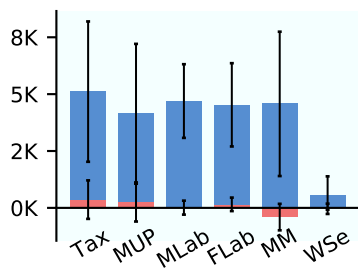

Netherlands

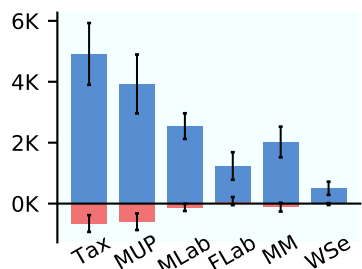

Norway

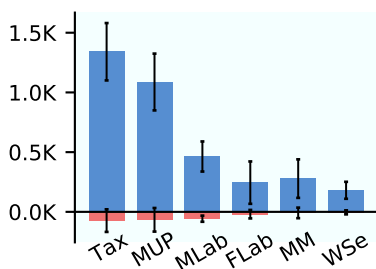

Poland

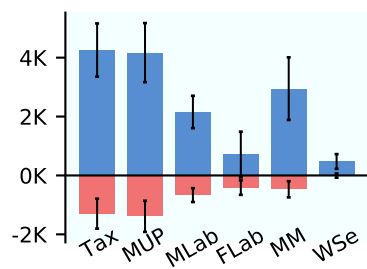

■ Cancer cases avoided (unrelated)

■ Cancer cases avoided (related)

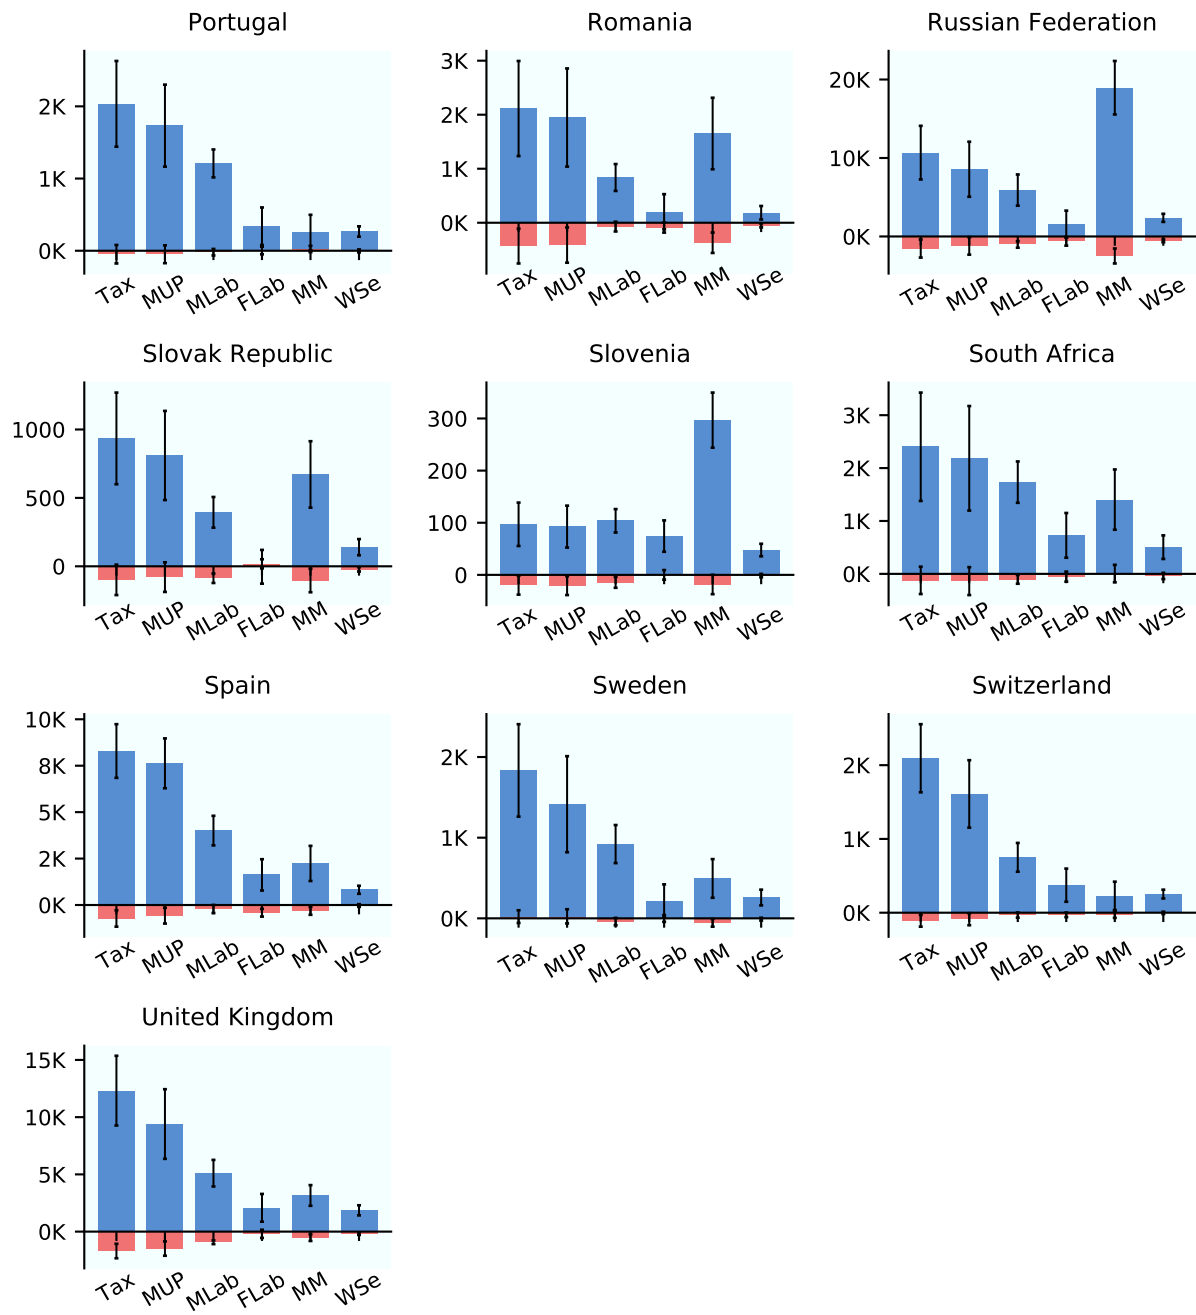

Figure S1 - New cancer cases avoided by country and intervention by year 2050

Note: The y-axis represents the total number of cancer cases avoided combined for years 2020-2050 as a result of each intervention, by country. Cancers cases avoided related to the intervention refer to liver, breast, esophageal and colorectal cancer cases. Cancer cases unrelated to the intervention refer to lung cancer cases. Cancer cases avoided which are negative (i.e. unrelated cancer cases) represent additional cancer cases caused by the intervention, while positive cancer cases avoided (i.e. related cancer cases) represent a decline in cancer cases.

Tax-Alcohol Taxation, MUP-Alcohol Minimum Unit Pricing, MLab-Menu Labelling, FLab-Food Labelling, MM-Mass Media Campaigns, WSe-Workplace Sedentary Behaviour, vertical black lines represent 95% CI

Source: OECD SPHeP-NCD model, 2020
